# Supplementary material
Source: PubMed Central journal article supplement (PMC7056552)
Supplement: NIHMS1548522-supplement-1.pdf [file NIHMS1548522-supplement-1.pdf]

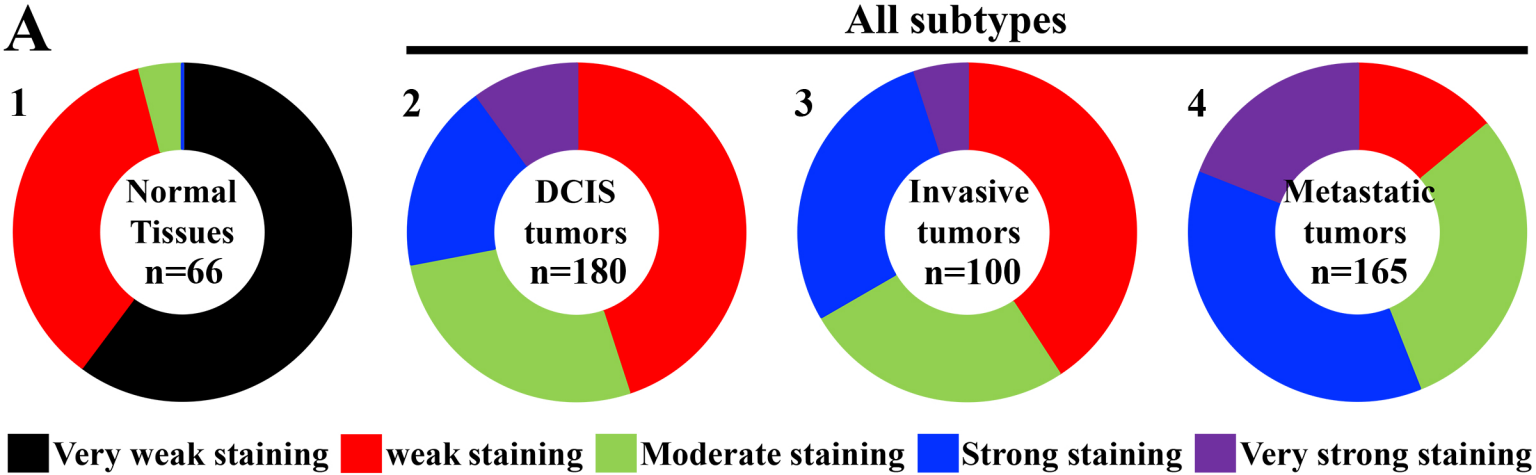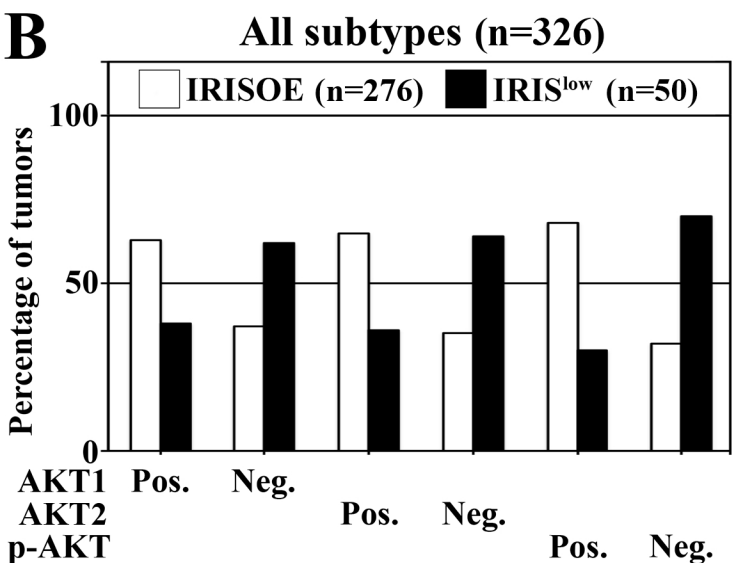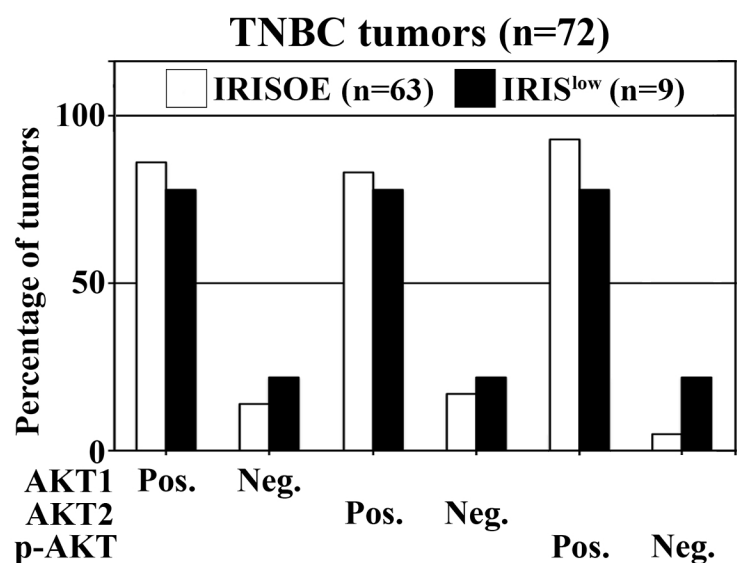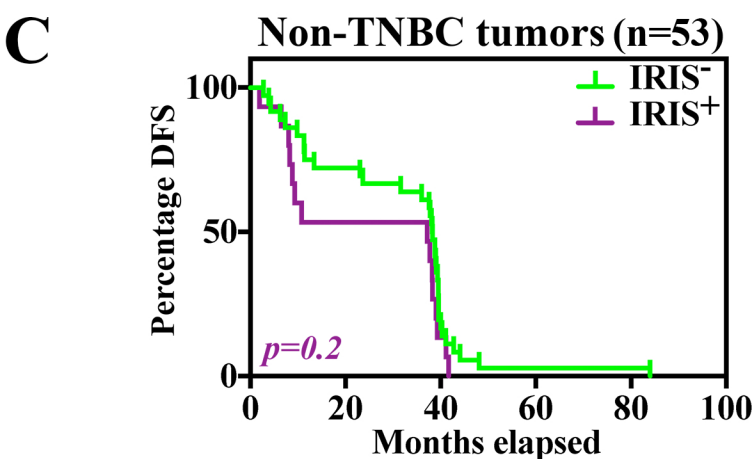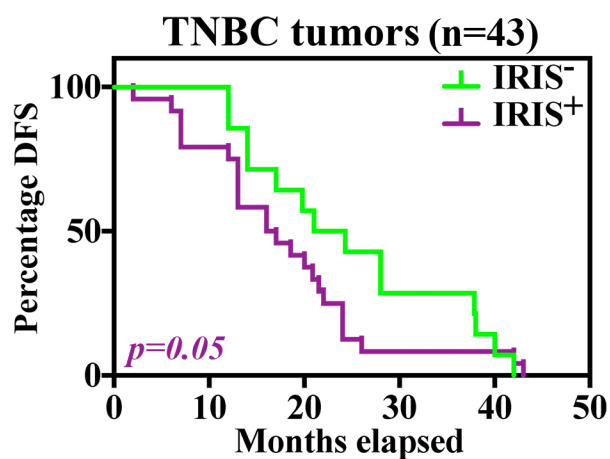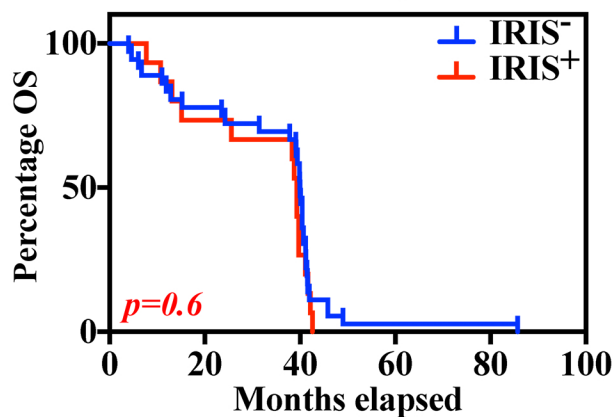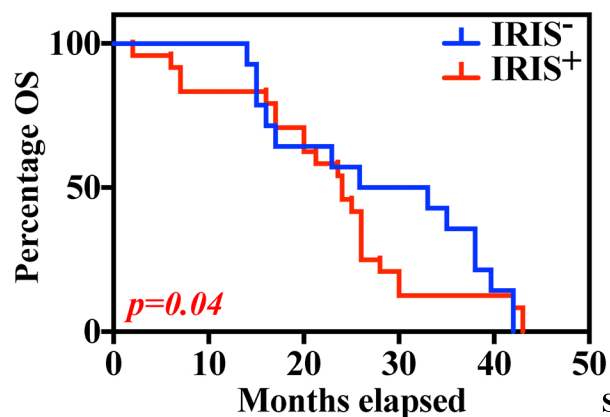

**Supplement Figure 1. IRISOE in aggressive TNBC tumors correlates with worse outcomes.**

(A) The expression of IRIS in normal/near cancer tissues (n=66), DCIS (n=180), invasive tumors (n=100), and metastatic tumors (n=165). (B) Correlation in breast cancer cohort of all subtypes (n=326) or TNBC tumors (n=72) between IRISOE (with cutoff defined as expression  $\geq 2$ fold compared to normal samples) vs. IRIS<sup>low</sup> (expressing normal tissues level) and AKT1, AKT2 and p-AKT expression extrapolated from cell counting in at least 10 high power fields (HPF) of each tumor. (C) Kaplan Meier curves of DFS and OS in non-TNBC (n=53) and TNBC (n=43) patients. Data modified from (16,19,29).
